# Supplementary material
Source: PubMed Central journal article supplement (PMC7180121)
Supplement: NIHMS1560347-supplement-Supplementary_Figures.pdf [file NIHMS1560347-supplement-Supplementary_Figures.pdf]

Suppl. Fig. 1

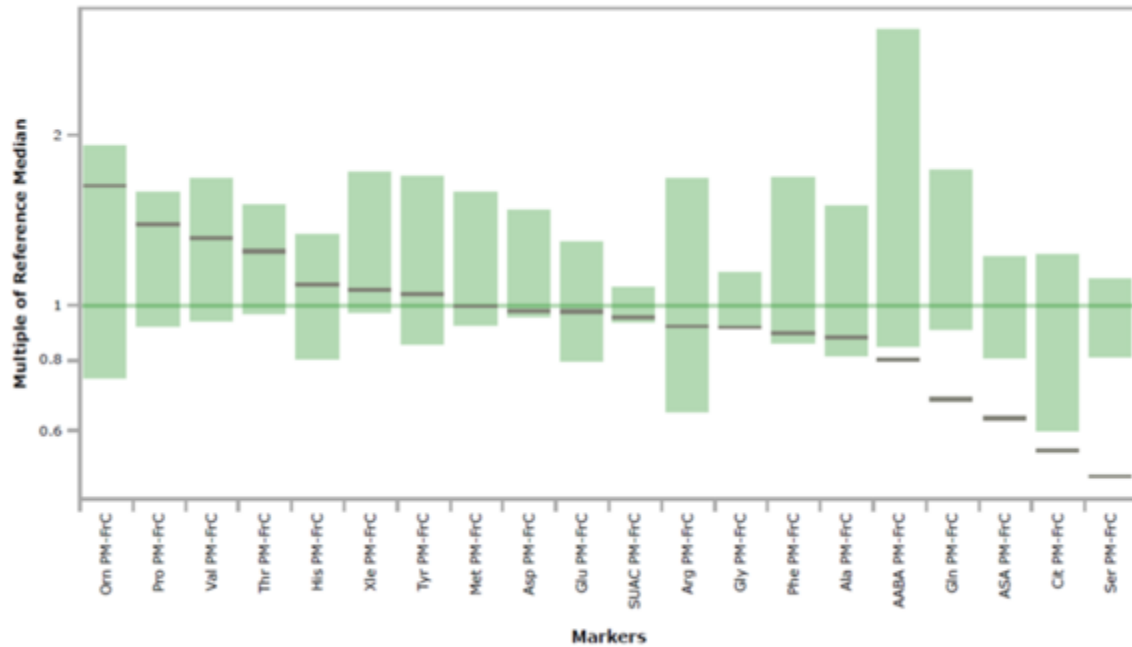

**Amino acid content in extracts of frontal cortex spotted onto filter paper and measured by tandem mass spectrometry.** The figure depicts the range of control values (n=4; green), with the median of control set to 1.0. Patient values are depicted as a horizontal black line. The y-axis depicts “multiples of the reference (control) median”. X-axis values indicate individual amino acid species. Abbreviations: PM-FrC, post-mortem frontal cortex; Xle, sum of leucine and isoleucine (isobaric); SUAC, succinylacetone; AABA,  $\alpha$ -aminobutyric acid; ASA, argininosuccinic acid; all other amino acids described using standard three letter abbreviations (PNG 25.7 mb)

[Full size image](#)

Suppl. Fig. 2

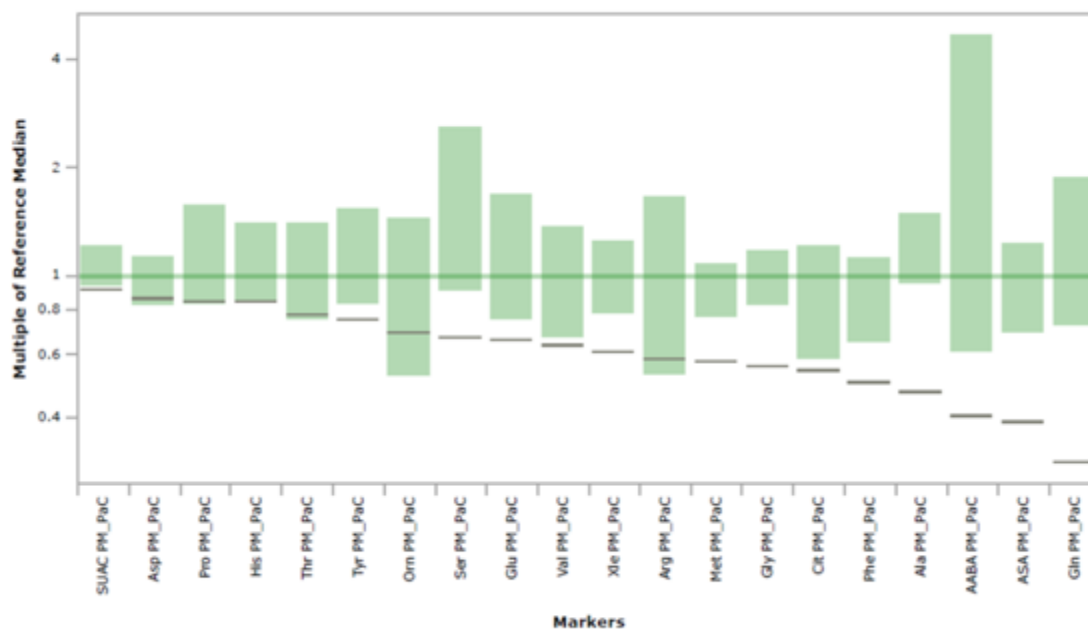

**Amino acid content in extracts of parietal cortex spotted onto filter paper and measured by tandem mass spectrometry.** The figure depicts the range of control values (n=4; green), with the median of control set to 1.0. Patient values are depicted as a horizontal black line. The y-axis depicts “multiples of the reference (control) median”. X-axis values indicate individual amino acid species. Abbreviations: PM-PaC, post-mortem parietal cortex; Xle, sum of leucine and isoleucine (isobaric); SUAC, succinylacetone; AABA,  $\alpha$ -aminobutyric acid; ASA, argininosuccinic acid; all other amino acids described using standard three letter abbreviations(PNG 6.44 mb)

[Full size image](#)  
**Suppl. Fig. 3**

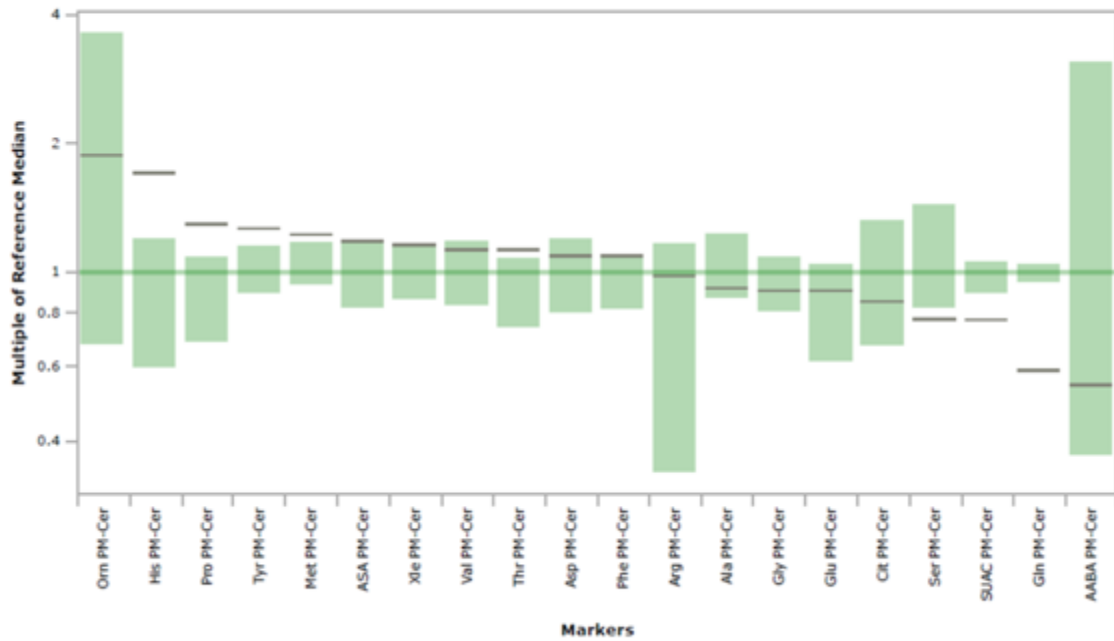

**Amino acid content in extracts of cerebellum spotted onto filter paper and measured by tandem mass spectrometry.** The figure depicts the range of control values (n=4; green), with the median of control set to 1.0. Patient values are depicted as a horizontal black line. The y-axis depicts “multiples of the reference (control) median”. X-axis values indicate individual amino acid species. Abbreviations: PM-Cer, post-mortem cerebellum; Xle, sum of leucine and isoleucine (isobaric); SUAC, succinylacetone; AABA,  $\alpha$ -aminobutyric acid; ASA, argininosuccinic acid; all other amino acids described using standard three letter abbreviations(PNG 6.44 mb)

[Full size image](#)

**Suppl. Fig. 4**

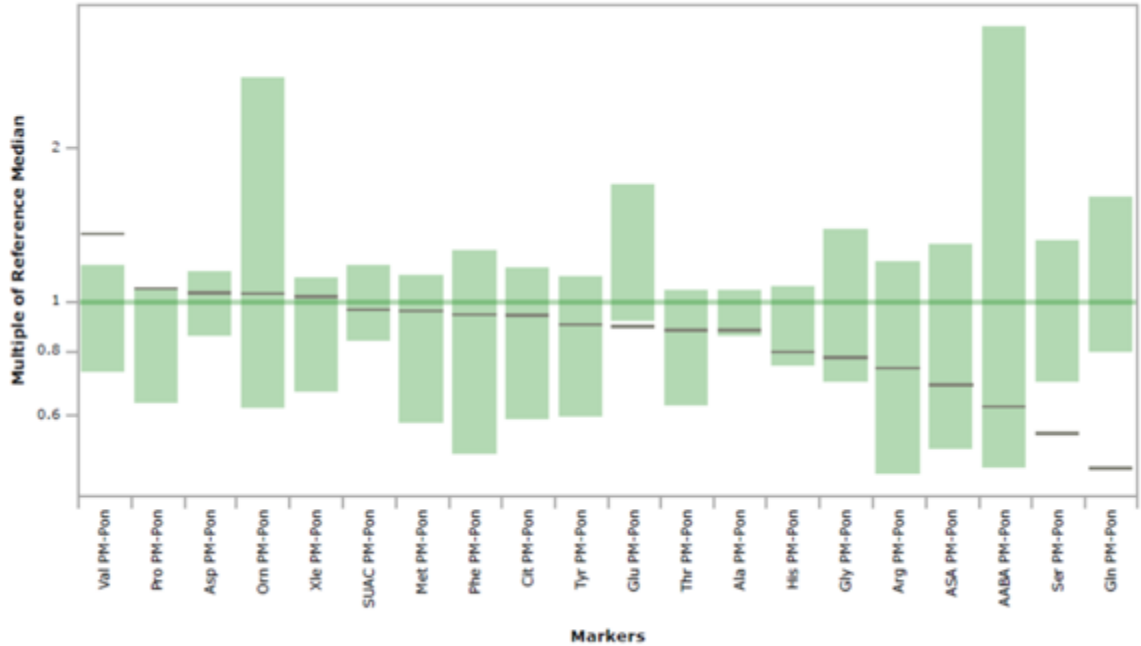

**Amino acid content in extracts of pons spotted onto filter paper and measured by tandem mass spectrometry.** The figure depicts the range of control values (n=4; green), with the median of control set to 1.0. Patient values are depicted as a horizontal black line. The y-axis depicts “multiples of the reference (control) median”. X-axis values indicate individual amino acid species. Abbreviations: PM-Pon, post-mortem pons; Xle, sum of leucine and isoleucine (isobaric); SUAC, succinylacetone; AABA,  $\alpha$ -aminobutyric acid; ASA, argininosuccinic acid; all other amino acids described using standard three letter abbreviations (PNG 6.44 mb)

[Full size image](#)  
**Suppl. Fig. 5**

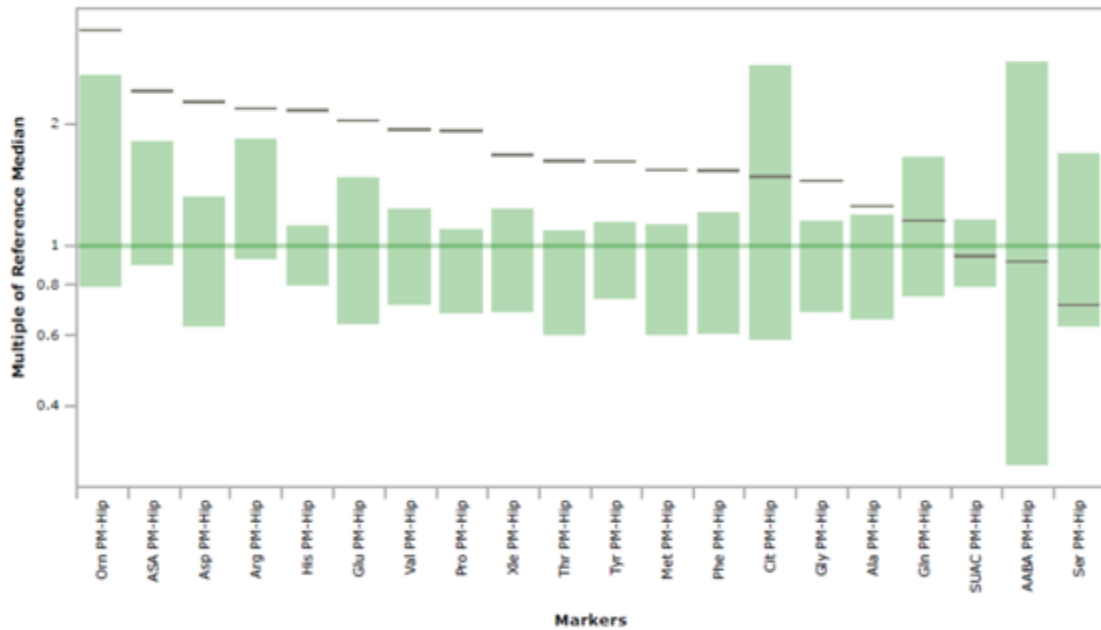

**Amino acid content in extracts of hippocampus spotted onto filter paper and measured by tandem mass spectrometry.** The figure depicts the range of control values (n=4; green), with the median of control set to 1.0. Patient values are depicted as a horizontal black line. The y-axis depicts “multiples of the reference (control) median”. X-axis values indicate individual amino acid species. Abbreviations: PM-Hip, post-mortem hippocampus; Xle, sum of leucine and isoleucine (isobaric); SUAC, succinylacetone; AABA,  $\alpha$ -aminobutyric acid; ASA, argininosuccinic acid; all other amino acids described using standard three letter abbreviations(PNG 6.44 mb)

[Full size image](#)

**Suppl. Fig. 6**

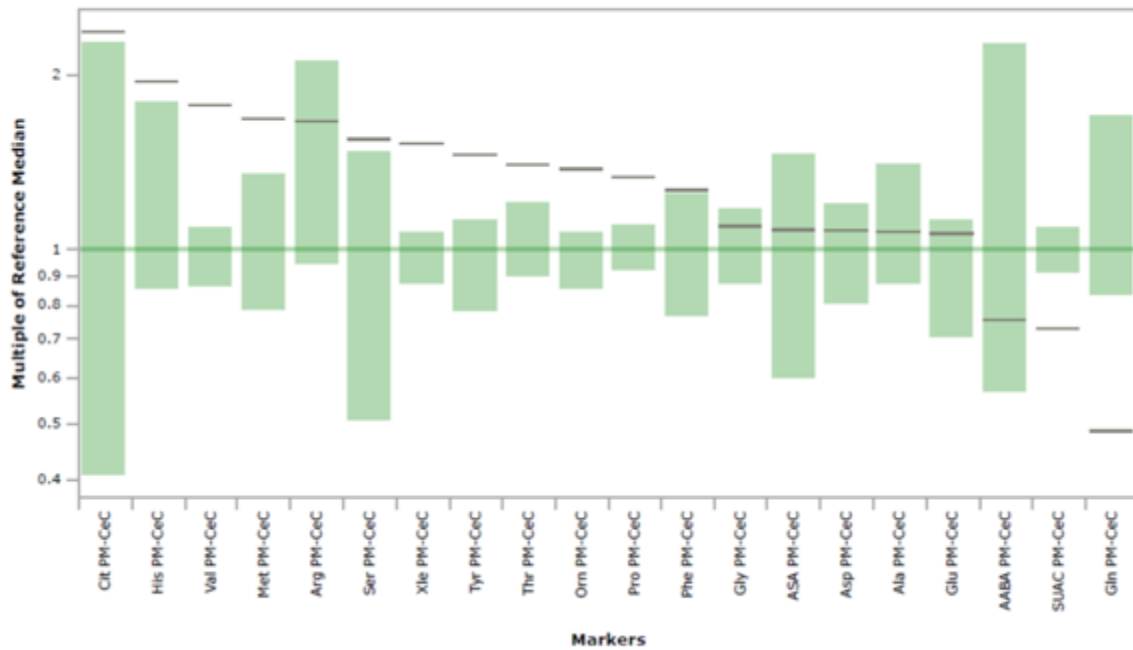

**Amino acid content in extracts of hippocampus spotted onto filter paper and measured by tandem mass spectrometry.** The figure depicts the range of control values (n=4; green), with the median of control set to 1.0. Patient values are depicted as a horizontal black line. The y-axis depicts “multiples of the reference (control) median”. X-axis values indicate individual amino acid species. Abbreviations: PM-Hip, post-mortem hippocampus; Xle, sum of leucine and isoleucine (isobaric); SUAC, succinylacetone; AABA,  $\alpha$ -aminobutyric acid; ASA, argininosuccinic acid; all other amino acids described using standard three letter abbreviations(PNG 6.44 mb)

[Full size image](#)

**Suppl. Fig. 7**

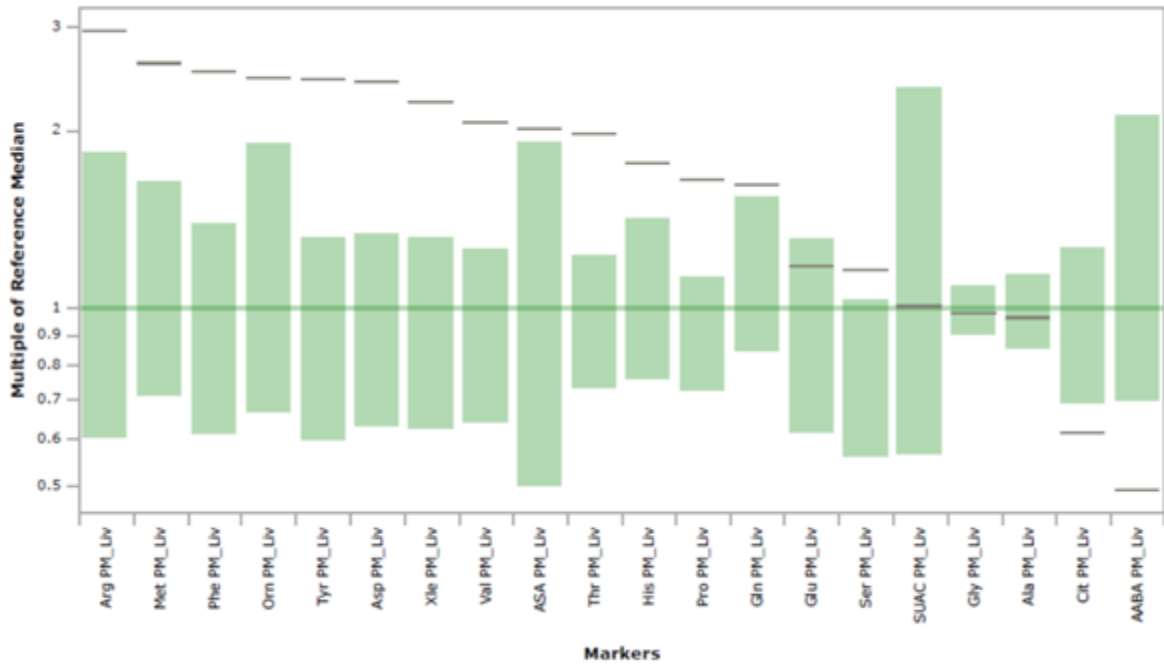

**Amino acid content in extracts of cerebral cortex spotted onto filter paper and measured by tandem mass spectrometry.** The figure depicts the range of control values (n=4; green), with the median of control set to 1.0. Patient values are depicted as a horizontal black line. The y-axis depicts “multiples of the reference (control) median”. X-axis values indicate individual amino acid species. Abbreviations: PM-Liv, post-mortem liver; Xle, sum of leucine and isoleucine (isobaric); SUAC, succinylacetone; AABA,  $\alpha$ -aminobutyric acid; ASA, argininosuccinic acid; all other amino acids described using standard three letter abbreviations(PNG 6.44 mb)

[Full size image](#)  
**Suppl. Fig. 8**

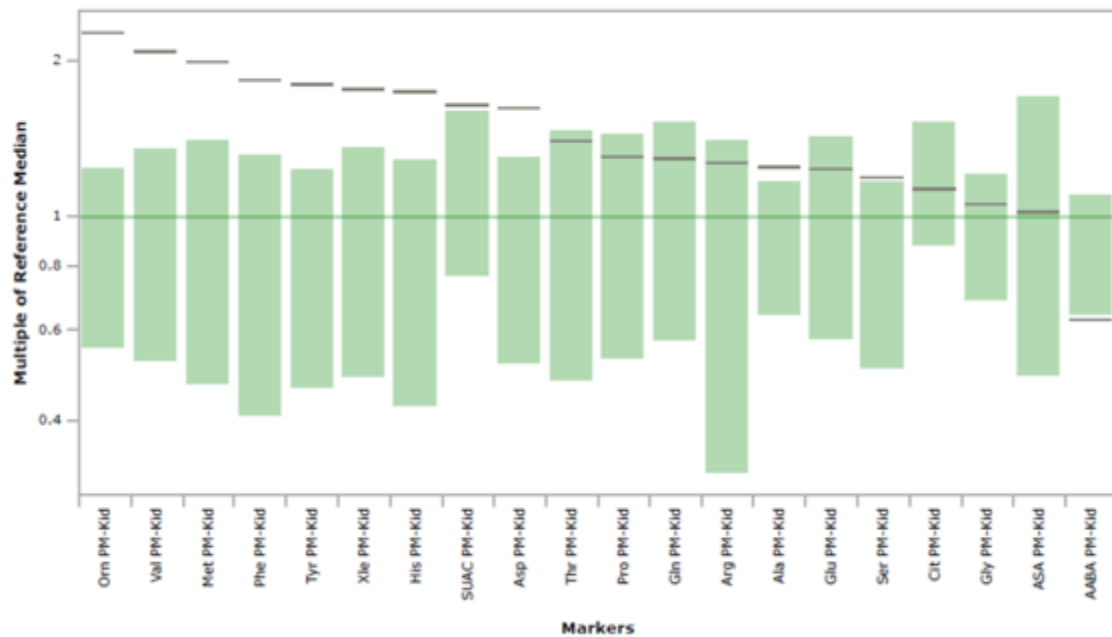

**Amino acid content in extracts of kidney spotted onto filter paper and measured by tandem mass spectrometry.** The figure depicts the range of control values (n=4; green), with the median of control set to 1.0. Patient values are depicted as a horizontal black line. The y-axis depicts “multiples of the reference (control) median”. X-axis values indicate individual amino acid species. Abbreviations: PM-Kid, post-mortem kidney; Xle, sum of leucine and isoleucine (isobaric); SUAC, succinylacetone; AABA,  $\alpha$ -aminobutyric acid; ASA, argininosuccinic acid; all other amino acids described using standard three letter abbreviations (PNG 6.44 mb)

[Full size image](#)  
**Suppl. Fig. 9**



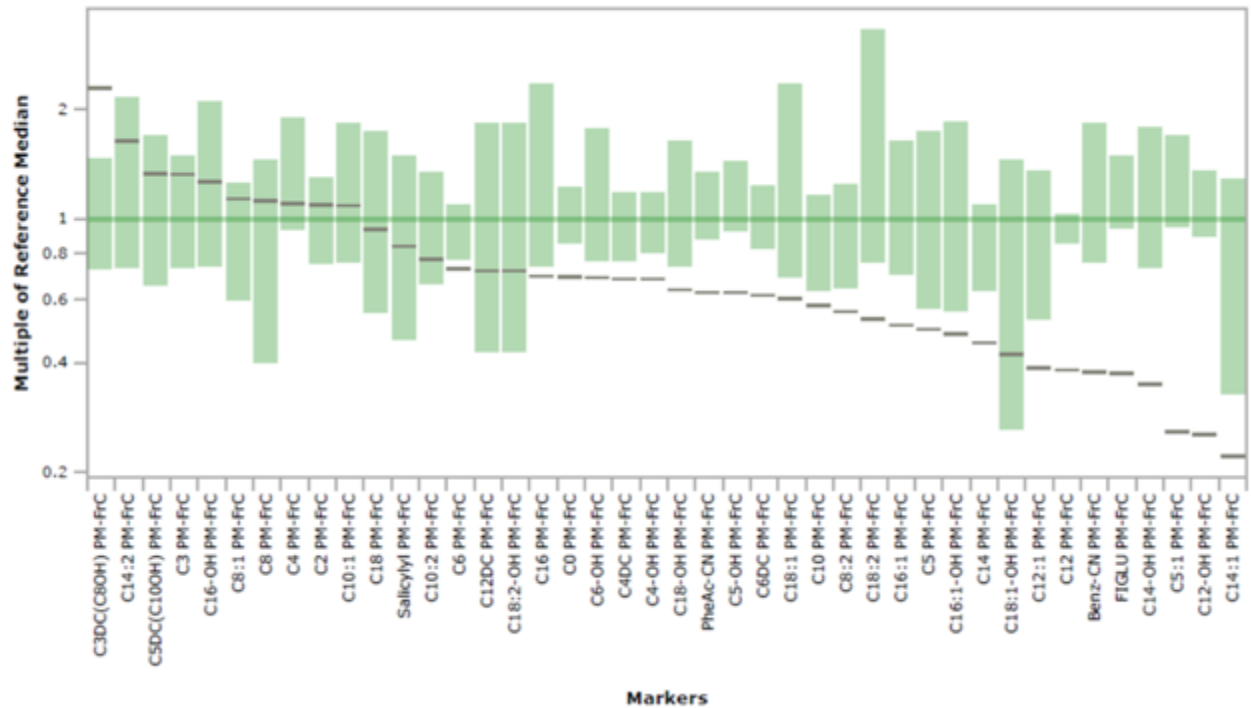

**Acylcarnitine content in extracts of frontal cortex spotted onto filter paper and measured by tandem mass spectrometry.** The figure depicts the range of control values (n=4; green), with the median of control set to 1.0. Patient values are depicted as a horizontal black line. The y-axis depicts “multiples of the reference (control) median”. For the x-axis, carnitine ester chain length is presented as carbon number (e.g., C3-carnitine, C4-carnitine). Single or double alkene species are presented as, for example, C14:1 and C14:2. Dicarboxylic acids (DC) are also presented as chain length, e.g., C12DC. Hydroxylated species are depicted as OH, e.g., C14-OH. Additional abbreviations employed: PM-FrC, post-mortem frontal cortex; CN, carnitine; salicyl, salicyl carnitine; PheAc-CN, phenylacetate carnitine; Benz-CN, benzoyl carnitine; FIGLU, formiminoglutamic acid. In those instances in which a marker is composed of two molecular ions of identical molecular weight, the data is depicted parenthetically (e.g. C5DC(C10OH), representing a mixture of C5 dicarboxylic acid and C10 hydroxyl carnitines) (PNG 6.44 mb)

[Full size image](#)  
**Suppl. Fig. 10**

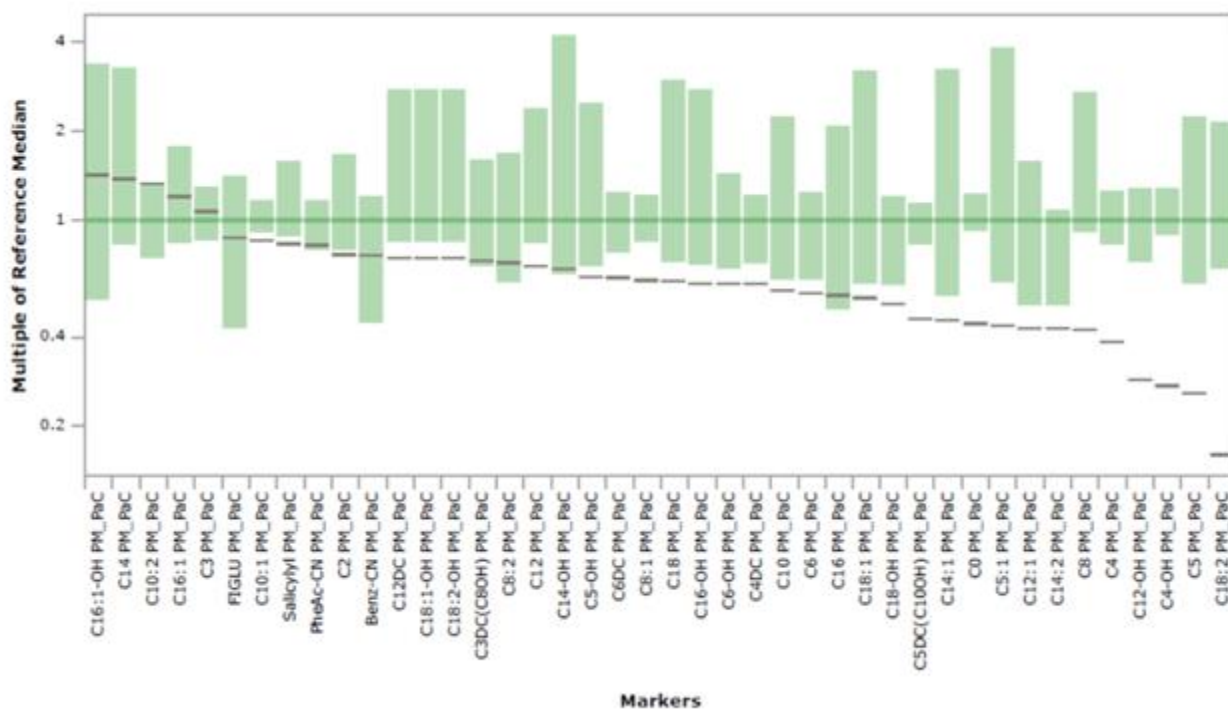

**Acylcarnitine content in extracts of parietal cortex spotted onto filter paper and measured by tandem mass spectrometry.** The figure depicts the range of control values (n=4; green), with the median of control set to 1.0. Patient values are depicted as a horizontal black line. The y-axis depicts “multiples of the reference (control) median”. For the x-axis, carnitine ester chain length is presented as carbon number (e.g., C3-carnitine, C4-carnitine). Single or double alkene species are presented as, for example, C14:1 and C14:2. Dicarboxylic acids (DC) are also presented as chain length, e.g., C12DC. Hydroxylated species are depicted as OH, e.g., C14-OH. Additional abbreviations employed: PM-PaC, post-mortem parietal cortex; CN, carnitine; salicyl, salicyl carnitine; PheAc-CN, phenylacetate carnitine; Benz-CN, benzoyl carnitine; FIGLU, formiminoglutamic acid. In those instances in which a marker is composed of two molecular ions of identical molecular weight, the data is depicted parenthetically (e.g. C5DC(C10OH), representing a mixture of C5 dicarboxylic acid and C10 hydroxyl carnitines) (PNG 6.44 mb)

[Full size image](#)  
**Suppl. Fig. 11**

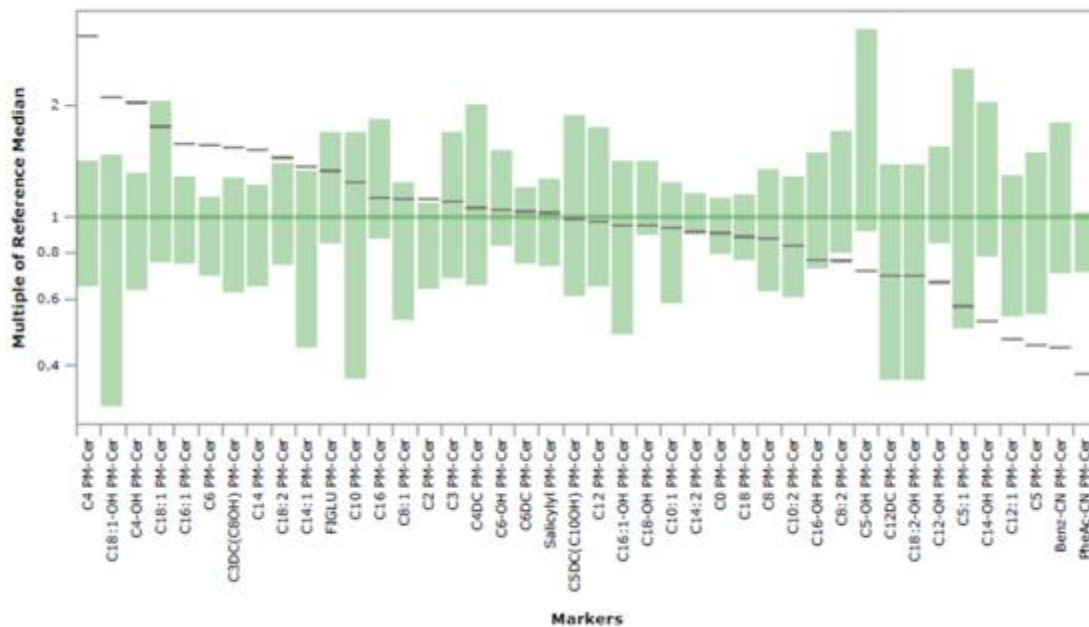

**Acylcarnitine content in extracts of cerebellum spotted onto filter paper and measured by tandem mass spectrometry.** The figure depicts the range of control values (n=4; green), with the median of control set to 1.0. Patient values are depicted as a horizontal black line. The y-axis depicts “multiples of the reference (control) median”. For the x-axis, carnitine ester chain length is presented as carbon number (e.g., C3-carnitine, C4-carnitine). Single or double alkene species are presented as, for example, C14:1 and C14:2. Dicarboxylic acids (DC) are also presented as chain length, e.g., C12DC. Hydroxylated species are depicted as OH, e.g., C14-OH. Additional abbreviations employed: PM-Cer, post-mortem cerebellum; CN, carnitine; salicyl, salicyl carnitine; PheAc-CN, phenylacetate carnitine; Benz-CN, benzoyl carnitine; FIGLU, formiminoglutamic acid. In those instances in which a marker is composed of two molecular ions of identical molecular weight, the data is depicted parenthetically (e.g. C5DC(C10OH), representing a mixture of C5 dicarboxylic acid and C10 hydroxyl carnitines)(PNG 6.44 mb)

[Full size image](#)  
**Suppl. Fig. 12**

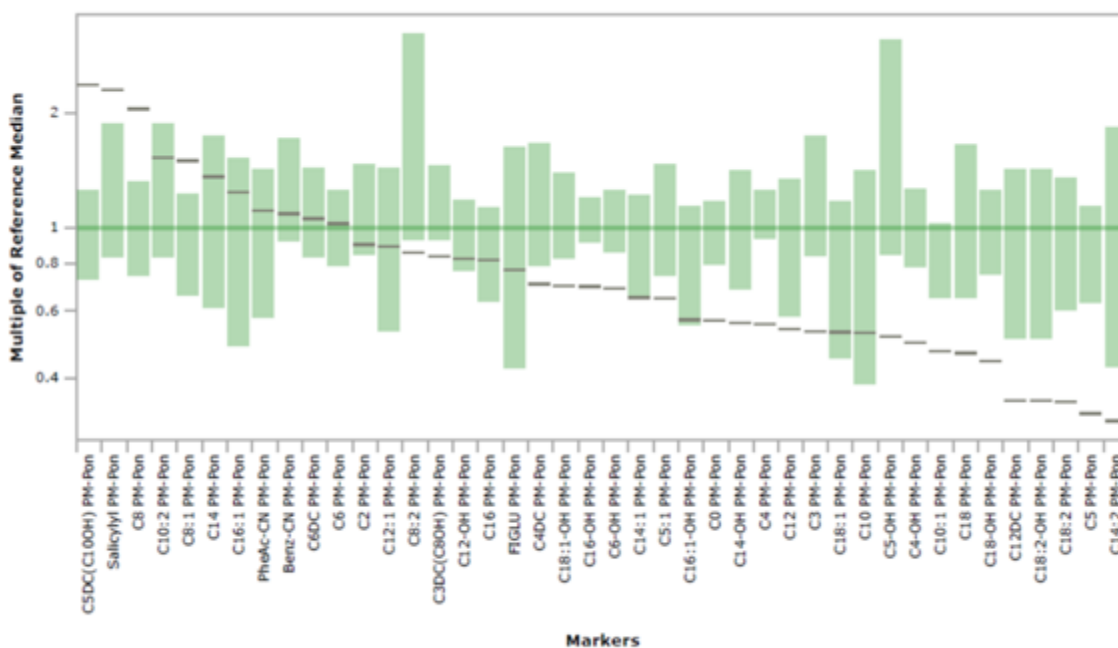

**Acylcarnitine content in extracts of pons spotted onto filter paper and measured by tandem mass spectrometry.** The figure depicts the range of control values (n=4; green), with the median of control set to 1.0. Patient values are depicted as a horizontal black line. The y-axis depicts “multiples of the reference (control) median”. For the x-axis, carnitine ester chain length is presented as carbon number (e.g., C3-carnitine, C4-carnitine). Single or double alkene species are presented as, for example, C14:1 and C14:2. Dicarboxylic acids (DC) are also presented as chain length, e.g., C12DC. Hydroxylated species are depicted as OH, e.g., C14-OH. Additional abbreviations employed: PM-Pon, post-mortem pons; CN, carnitine; salicyl, salicyl carnitine; PheAc-CN, phenylacetate carnitine; Benz-CN, benzoyl carnitine; FIGLU, formiminoglutamic acid. In those instances in which a marker is composed of two molecular ions of identical molecular weight, the data is depicted parenthetically (e.g. C5DC(C10OH), representing a mixture of C5 dicarboxylic acid and C10 hydroxyl carnitines)(PNG 6.44 mb)

[Full size image](#)  
**Suppl. Fig. 13**

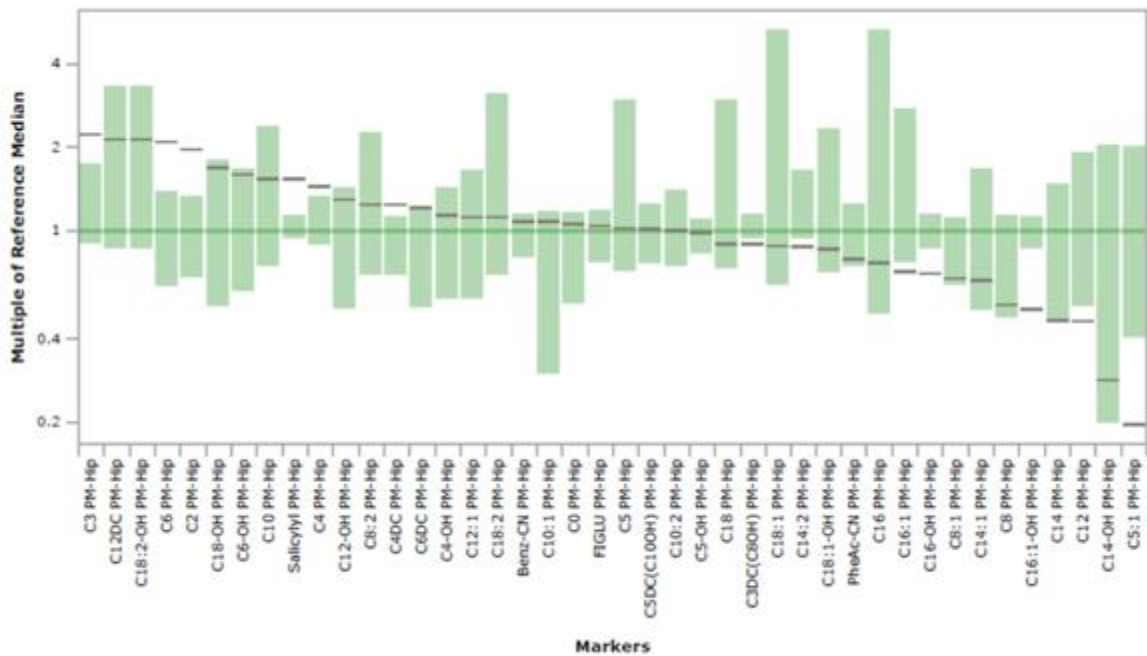

**Acylcarnitine content in extracts of hippocampus spotted onto filter paper and measured by tandem mass spectrometry.** The figure depicts the range of control values (n=4; green), with the median of control set to 1.0. Patient values are depicted as a horizontal black line. The y-axis depicts “multiples of the reference (control) median”. For the x-axis, carnitine ester chain length is presented as carbon number (e.g., C3-carnitine, C4-carnitine). Single or double alkene species are presented as, for example, C14:1 and C14:2. Dicarboxylic acids (DC) are also presented as chain length, e.g., C12DC. Hydroxylated species are depicted as OH, e.g., C14-OH. Additional abbreviations employed: CN, carnitine; salicyl, salicyl carnitine; PheAc-CN, phenylacetate carnitine; Benz-CN, benzoyl carnitine; FIGLU, formiminoglutamic acid; PM-Hip, post-mortem hippocampus. In those instances in which a marker is composed of two molecular ions of identical molecular weight, the data is depicted parenthetically (e.g. C5DC(C10OH), representing a mixture of C5 dicarboxylic acid and C10 hydroxyl carnitines)(PNG 6.44 mb)

[Full size image](#)  
**Suppl. Fig. 14**

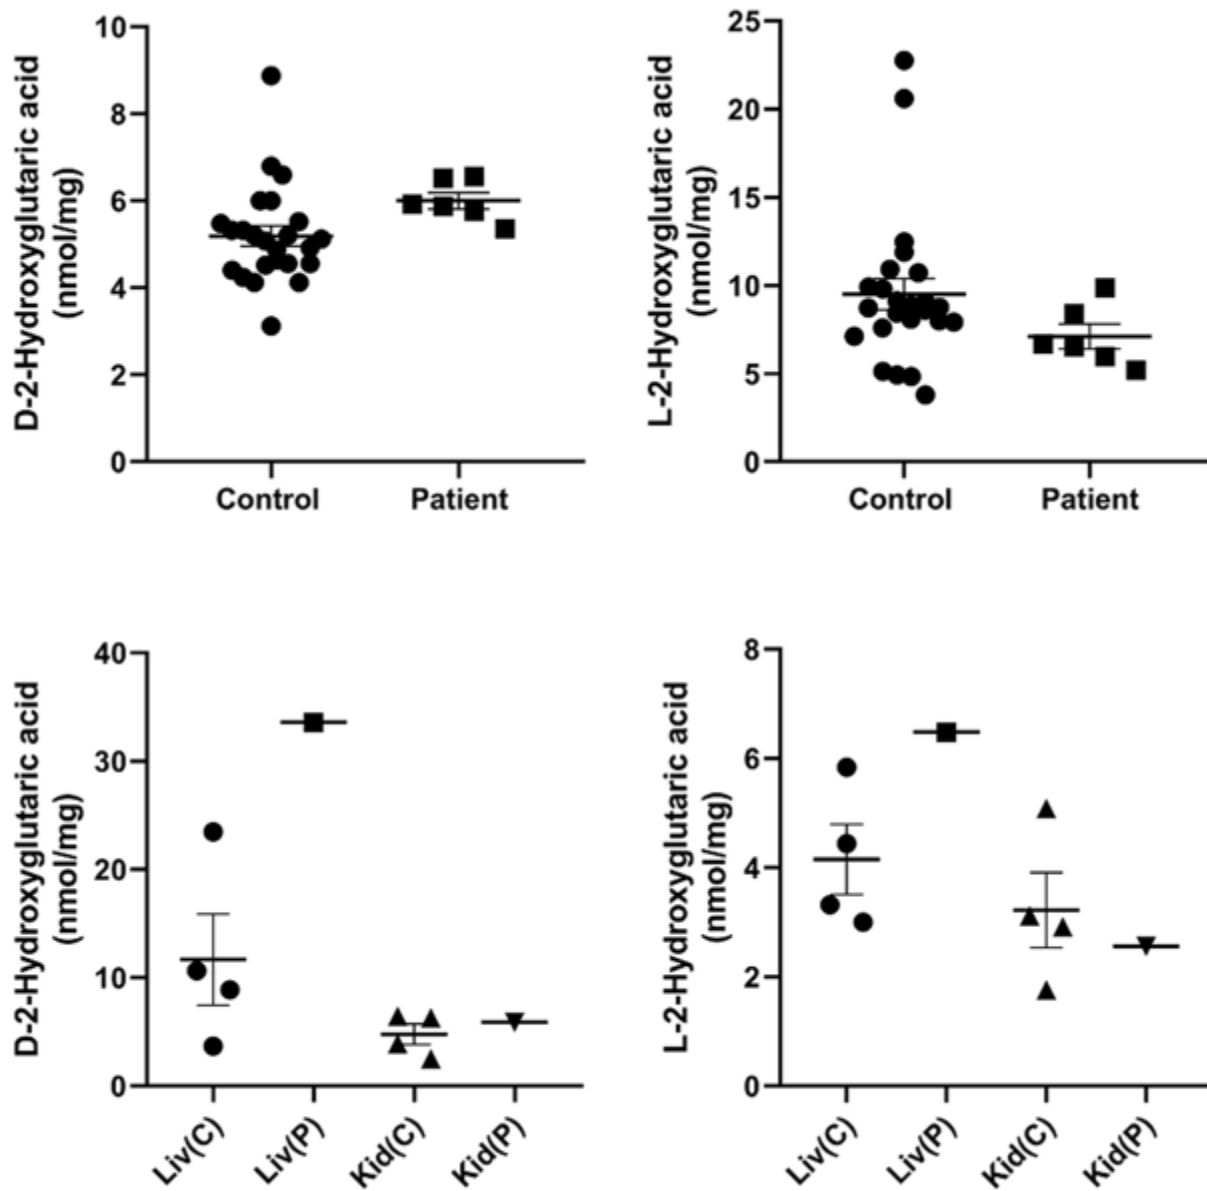

**Acylcarnitine content in extracts of cerebral cortex spotted onto filter paper and measured by tandem mass spectrometry.** The figure depicts the range of control values (n=4; green), with the median of control set to 1.0. Patient values are depicted as a horizontal black line. The y-axis depicts “multiples of the reference (control) median”. For the x-axis, carnitine ester chain length is presented as carbon number (e.g., C3-carnitine, C4-carnitine). Single or double alkene species are presented as, for example, C14:1 and C14:2. Dicarboxylic acids (DC) are also presented as chain length, e.g., C12DC. Hydroxylated species are depicted as OH, e.g., C14-OH. Additional abbreviations employed: PM-CeC, post-mortem cerebral cortex; CN, carnitine; salicyl, salicyl carnitine; PheAc-CN, phenylacetate carnitine; Benz-CN, benzoyl carnitine; FIGLU,

formiminoglutamic acid. In those instances in which a marker is composed of two molecular ions of identical molecular weight, the data is depicted parenthetically (e.g. C5DC(C10OH), representing a mixture of C5 dicarboxylic acid and C10 hydroxyl carnitines)(PNG 227 kb)

[Full size image](#)  
**Suppl. Fig. 15**

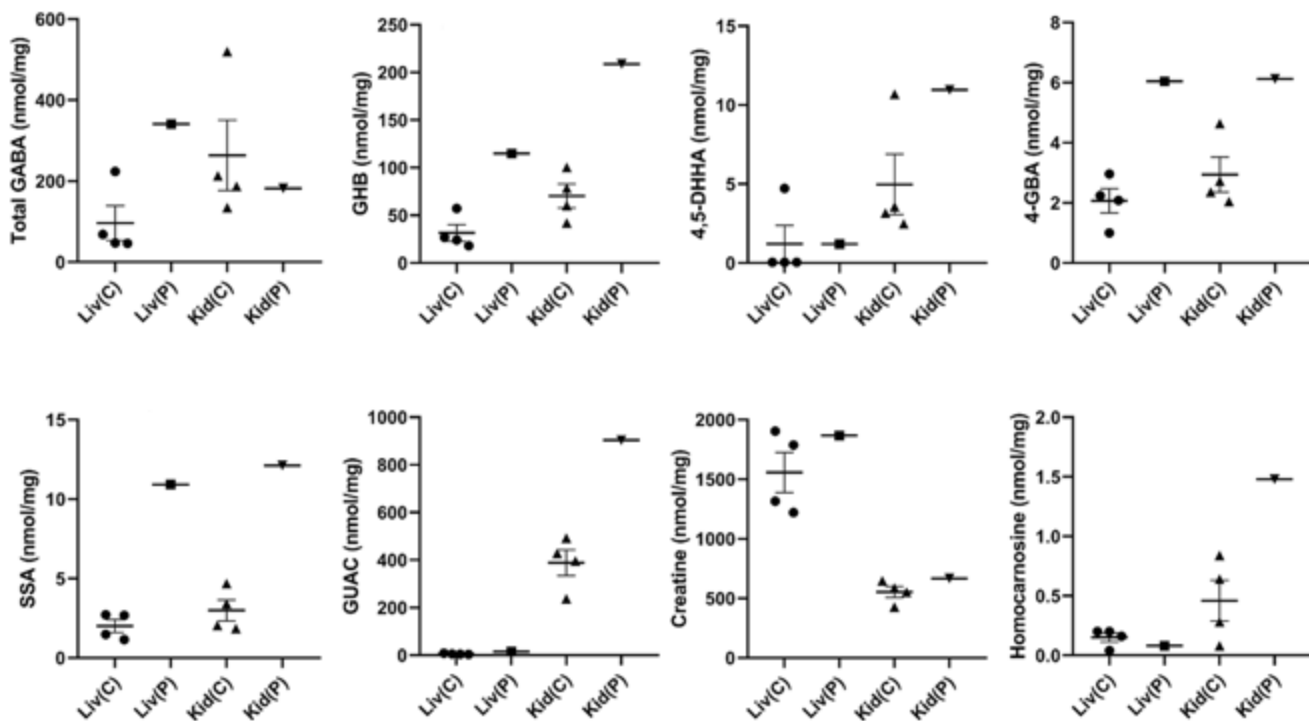

**Acylcarnitine content in extracts of liver spotted onto filter paper and measured by tandem mass spectrometry.** The figure depicts the range of control values (n=4; green), with the median of control set to 1.0. Patient values are depicted as a horizontal black line. The y-axis depicts “multiples of the reference (control) median”. For the x-axis, carnitine ester chain length is presented as carbon number (e.g., C3-carnitine, C4-carnitine). Single or double alkene species are presented as, for example, C14:1 and C14:2. Dicarboxylic acids (DC) are also presented as chain length, e.g., C12DC. Hydroxylated species are depicted as OH, e.g., C14-OH. Additional abbreviations employed: PM-Liv, post-mortem liver; CN, carnitine; salicyl, salicyl carnitine; PheAc-CN, phenylacetate carnitine; Benz-CN, benzoyl carnitine; FIGLU, formiminoglutamic acid. In those instances in which a marker is composed of two molecular ions of identical molecular weight, the data is depicted parenthetically (e.g. C5DC(C10OH), representing a mixture of C5 dicarboxylic acid and C10 hydroxyl carnitines)(PNG 314 kb)

[Full size image](#)  
**Suppl. Fig. 16**

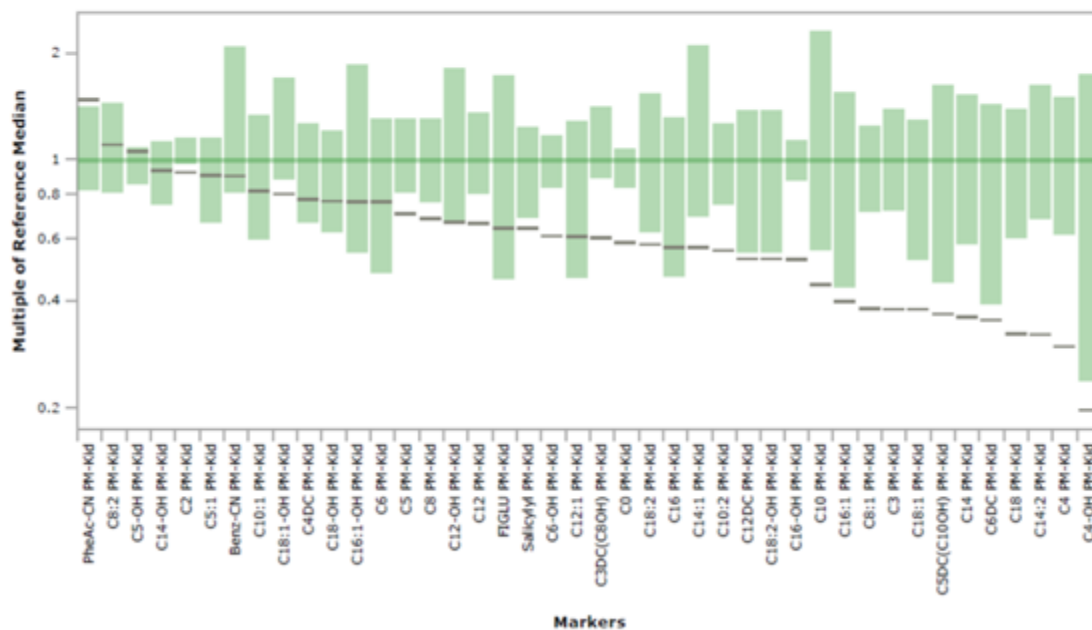

**Acylcarnitine content in extracts of kidney spotted onto filter paper and measured by tandem mass spectrometry.** The figure depicts the range of control values (n=4; green), with the median of control set to 1.0. Patient values are depicted as a horizontal blackline. The y-axis depicts “multiples of the reference (control) median”. For the x-axis, carnitine ester chain length is presented as carbon number (e.g., C3-carnitine, C4-carnitine). Single or double alkene species are presented as, for example, C14:1 and C14:2. Dicarboxylic acids (DC) are also presented as chain length, e.g., C12DC. Hydroxylated species are depicted as OH, e.g., C14-OH. Additional abbreviations employed: PM-Kid, post-mortem kidney; CN, carnitine; salicyl, salicyl carnitine; PheAc-CN, phenylacetate carnitine; Benz-CN, benzoyl carnitine; FIGLU, formiminoglutamic acid. In those instances in which a marker is composed of two molecular ions of identical molecular weight, the data is depicted parenthetically (e.g. C5DC(C10OH), representing a mixture of C5 dicarboxylic acid and C10 hydroxyl carnitines). (PNG 6.44 mb)

[Full size image](#)

**Suppl. Fig. 17**



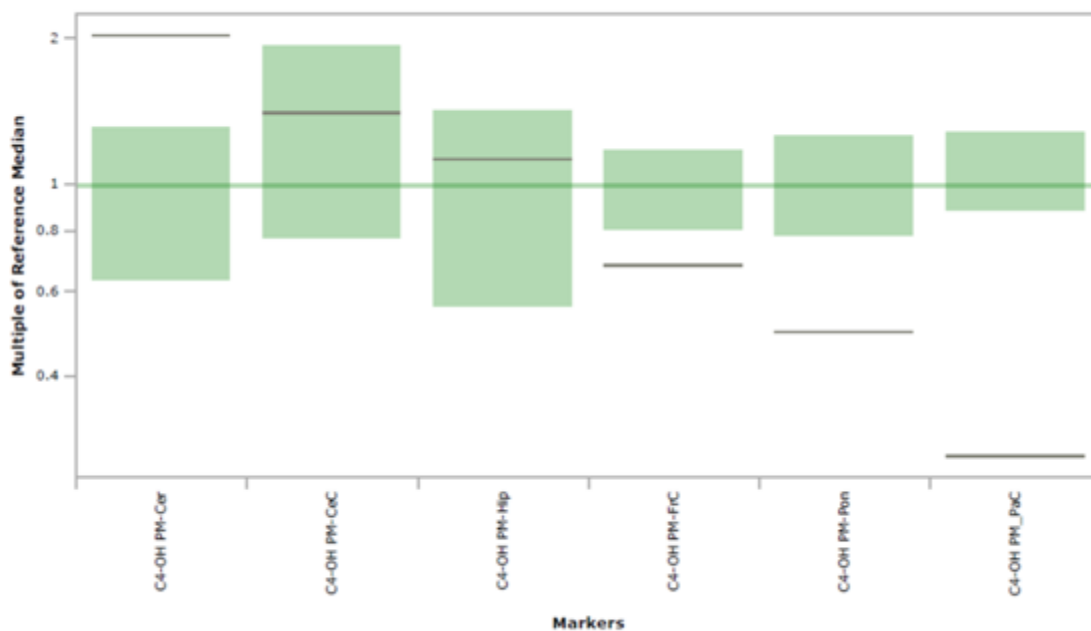

**Content of C4OH carnitine in regional brain extracts spotted onto filterpaper and measured by tandem mass spectrometry.** The figure depicts the range of control values (n=4; green), with the median of control set to 1.0. Patient values are depicted as a horizontal black line. The y-axis depicts “multiples of the reference (control) median”. For the x-axis, carnitine ester chain length is presented as carbon number (e.g., C3-carnitine, C4-carnitine). Single or double alkene species are presented as, for example, C14:1 and C14:2. Dicarboxylic acids (DC) are also presented as chain length, e.g., C12DC. Hydroxylated species are depicted as OH, e.g., C14-OH. Additional abbreviations employed: PM-Liv, post-mortem liver; CN, carnitine; salicyl, salicyl carnitine; PheAc-CN, phenylacetate carnitine; Benz-CN, benzoyl carnitine; FIGLU, formiminoglutamic acid. In those instances in which a marker is composed of two molecular ions of identical molecular weight, the data is depicted parenthetically (e.g. C5DC(C10OH), representing a mixture of C5 dicarboxylic acid and C10 hydroxyl carnitines)(PNG 6.44 mb)

[Full size image](#)

**Suppl. Fig. 18**

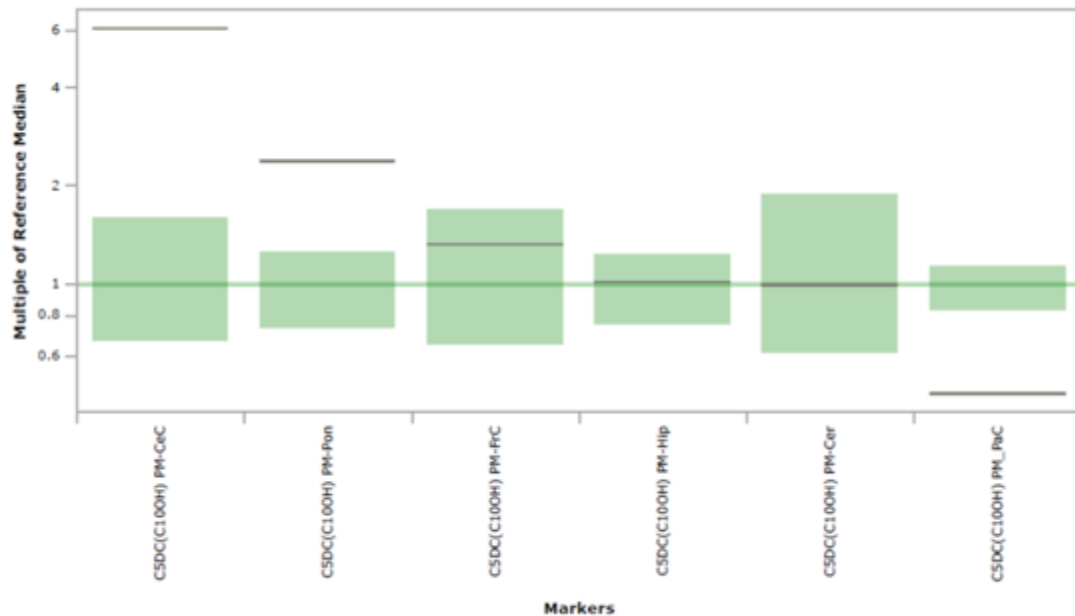

**Content of C5DC carnitine in regional brain extracts spotted onto filter paper and measured by tandem mass spectrometry.** The figure depicts the range of control values (n=4; green), with the median of control set to 1.0. Patient values are depicted as a horizontal black line. The y-axis depicts “multiples of the reference (control) median”. Abbreviations: C5DC, C5 dicarboxylic acid carnitine (e.g., glutarylcarnitine); PM, post-mortem; Cer, cerebellum; CeC, cerebral cortex; FrC, frontal cortex; Hip, hippocampus; Pon, pons; PaC, parietal cortex. For C5DC carnitine, the data represents two molecular ions of identical molecular weight (e.g. C5DC(C10OH), representing a mixture of C5 dicarboxylic acid and C10 hydroxyl carnitines); nonetheless, the predominant species here is C5DC carnitine (PNG 6.44 mb)

[Full size image](#)

**Suppl. Fig. 19**

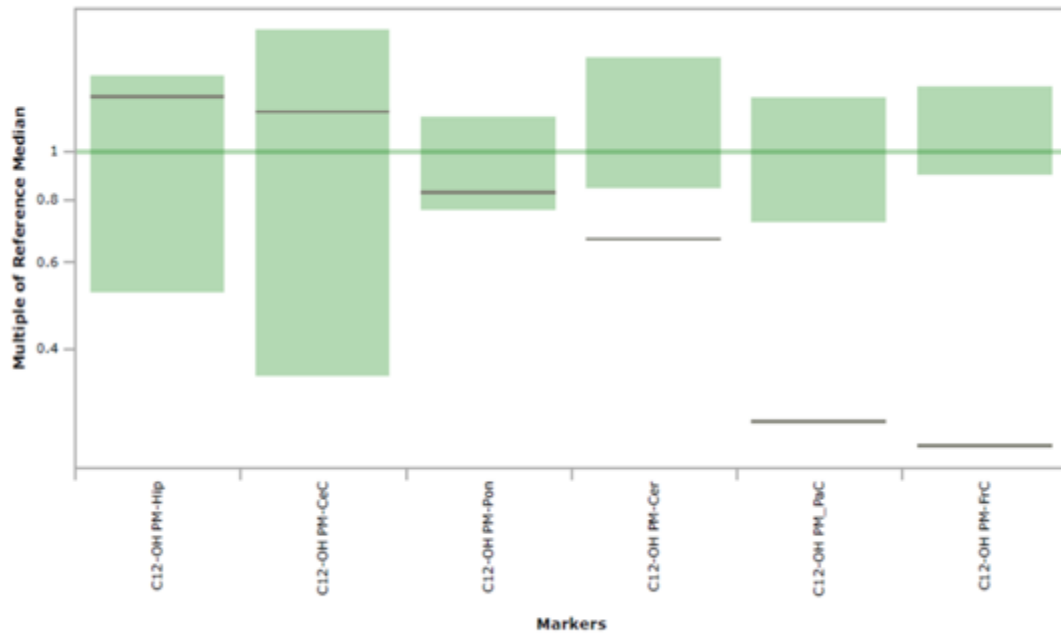

**Content of C12OH carnitine in regional brain extracts spotted onto filterpaper and measured by tandem mass spectrometry.** The figure depicts the range of control values (n=4; green), with the median of control set to 1.0. Patient values are depicted as a horizontal black line. The y-axis depicts “multiples of the reference (control) median”. Abbreviations: C12OH, C12 hydroxy carnitine; PM, post-mortem; Cer, cerebellum; CeC, cerebral cortex; FrC, frontal cortex; Hip, hippocampus; Pon, pons; PaC, parietal cortex (PNG 6.44 mb)

[Full size image](#)  
**Suppl. Fig. 20**

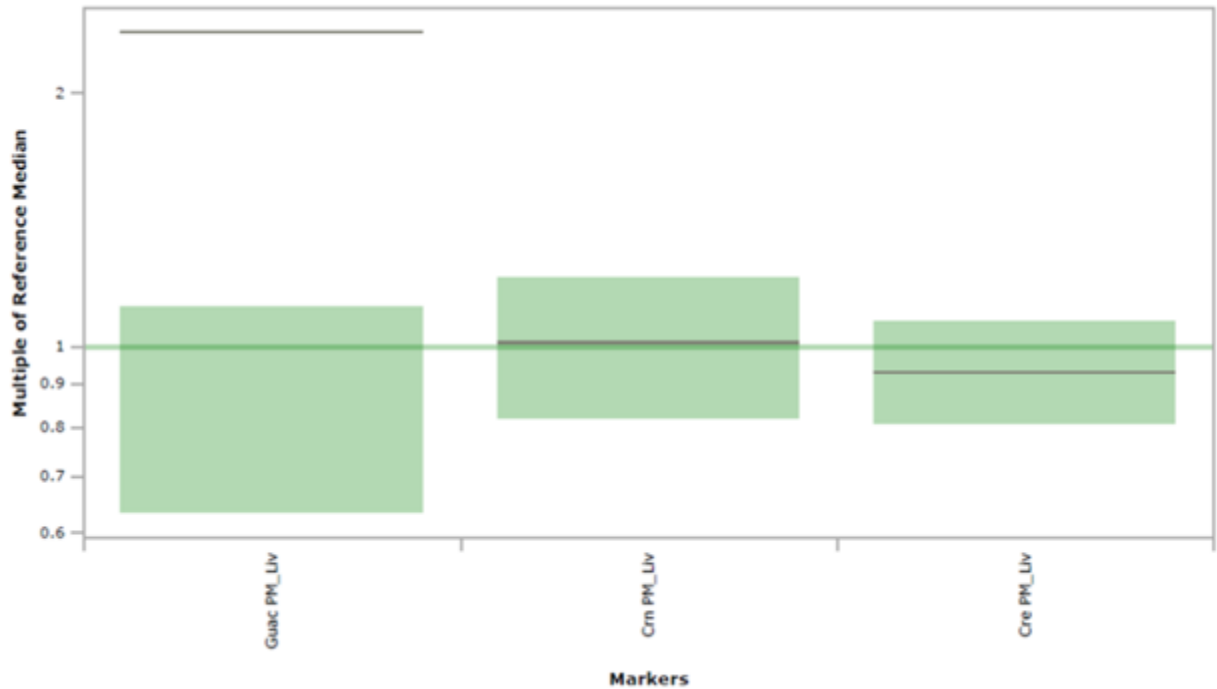

**Content of guanidino- species in extracts of liver spotted onto filter paper and measured by tandem mass spectrometry.** The figure depicts the range of control values (n=4; green), with the median of control set to 1.0. Patient values are depicted as a horizontal black line. The y-axis depicts “multiples of the reference (control) median”. Abbreviations: Liv, liver; guac, guanidinoacetic acid; cre, creatine; crn, creatinine; PM, post-mortem (PNG 6.44 mb)

[Full size image](#)

**Suppl. Fig. 21**

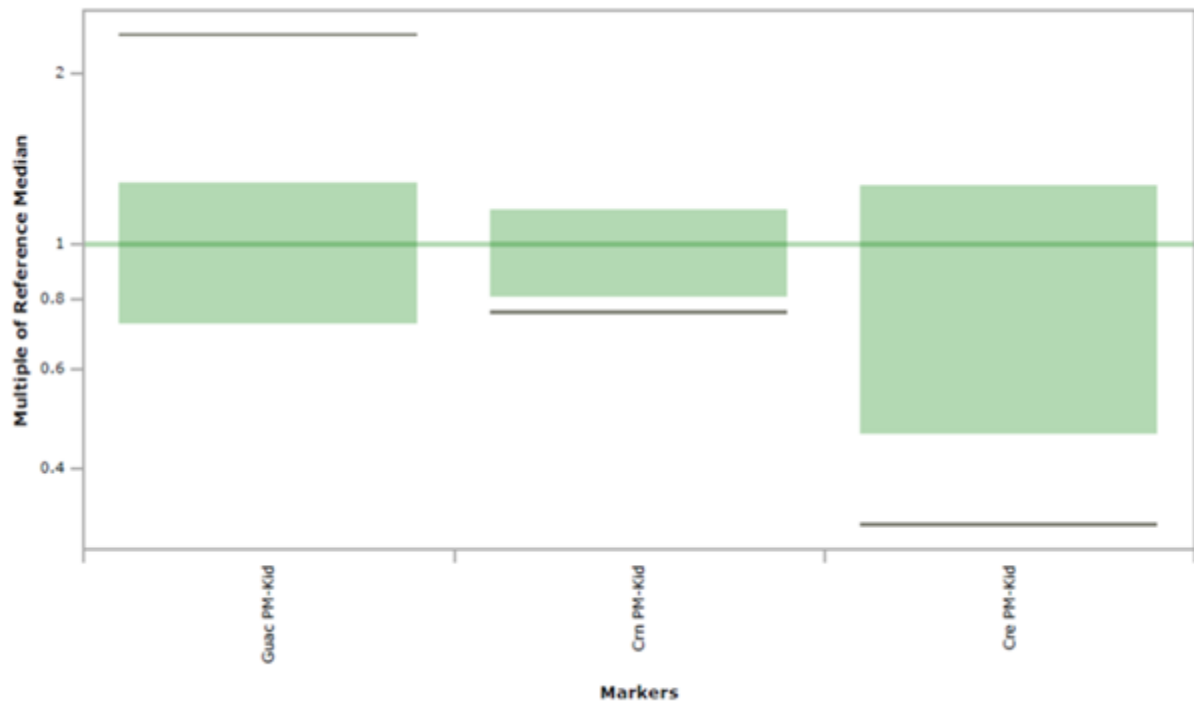

**Content of guanidino- species in extracts of kidney spotted onto filter paper and measured by tandem mass spectrometry.** The figure depicts the range of control values (n=4; green), with the median of control set to 1.0. Patient values are depicted as a horizontal black line. The y-axis depicts “multiples of the reference (control) median”. Abbreviations: Kid, kidney; guac, guanidinoacetic acid; cre, creatine; crn, creatinine; PM, post-mortem (PNG 6.44 mb)

[Full size image](#)

**Suppl. Fig. 22**

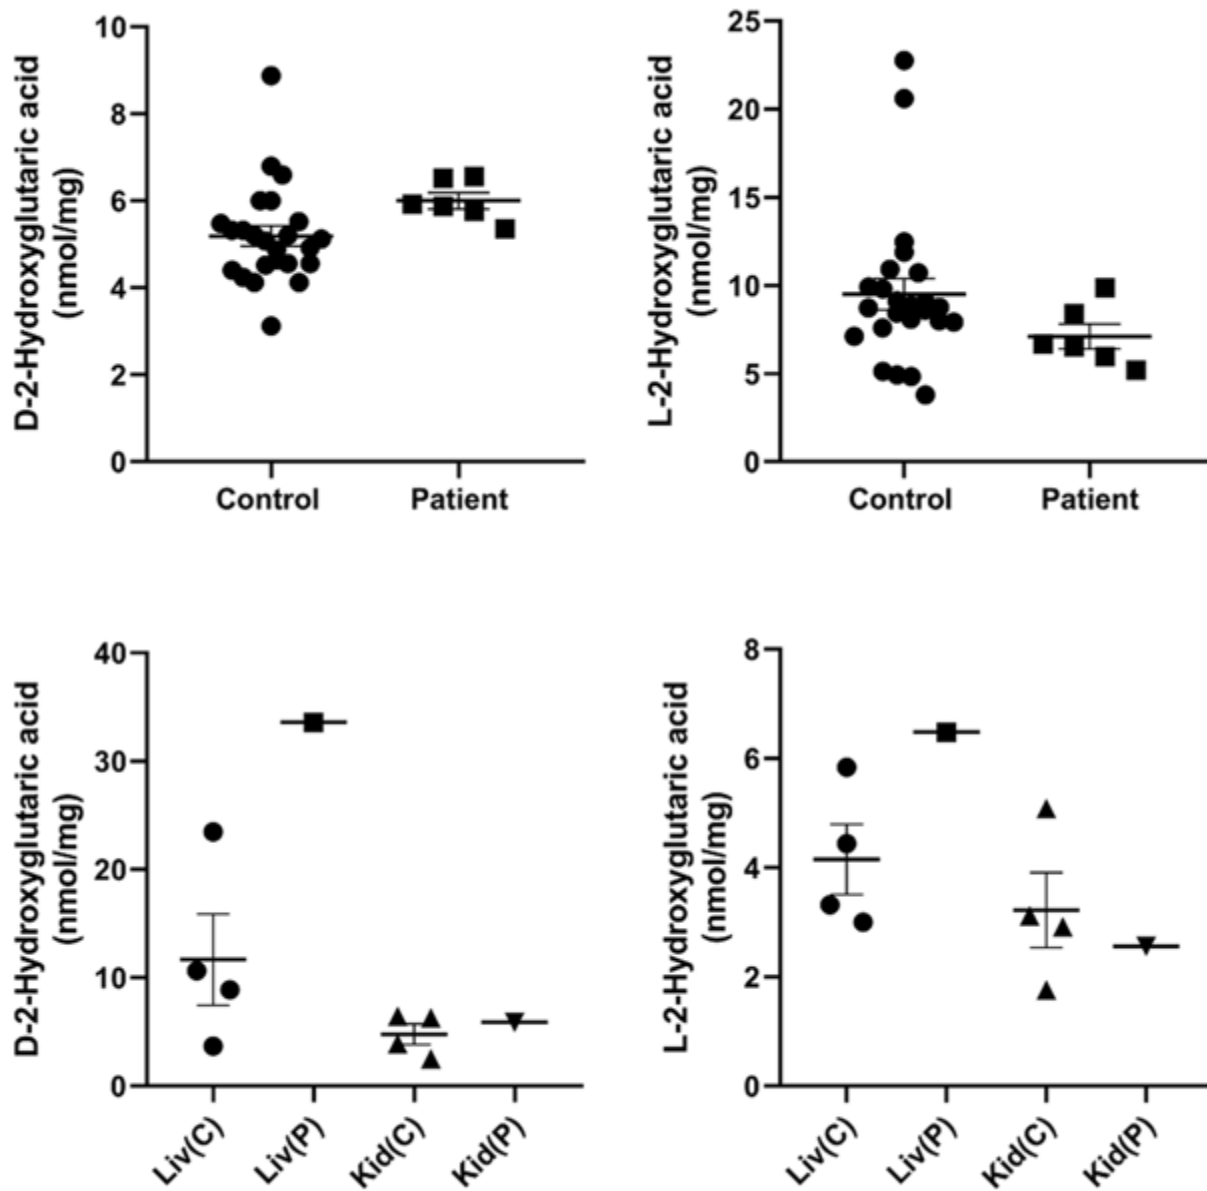

**Quantitation of D- and L-2-hydroxyglutaric acids in pooled brain regions (top panels), as well as liver and kidney (bottom panels) using isotope dilution mass spectrometry.** Values in top panels represent the sum of all analyses across all brain regions for both  $n=4$  controls and the patient (regions: cerebellum, frontal and parietal cortices, pons, hippocampus, cerebral cortex, cerebellum). Statistical analyses, two-tailed  $t$  test ( $p=ns$  for both). Data depicted as mean + SEM. Bottom panels depict the range (mean + SEM) for controls ( $n=4$ ) controls in both liver (liv) and kidney (kid), as well as the value obtained for the patient. Additional abbreviation: P, patient; C, control. Since only a single measure for the patient was available, statistical evaluation was not undertaken (PNG 6.61 mb)

[Full size image](#)  
Suppl. Fig. 23

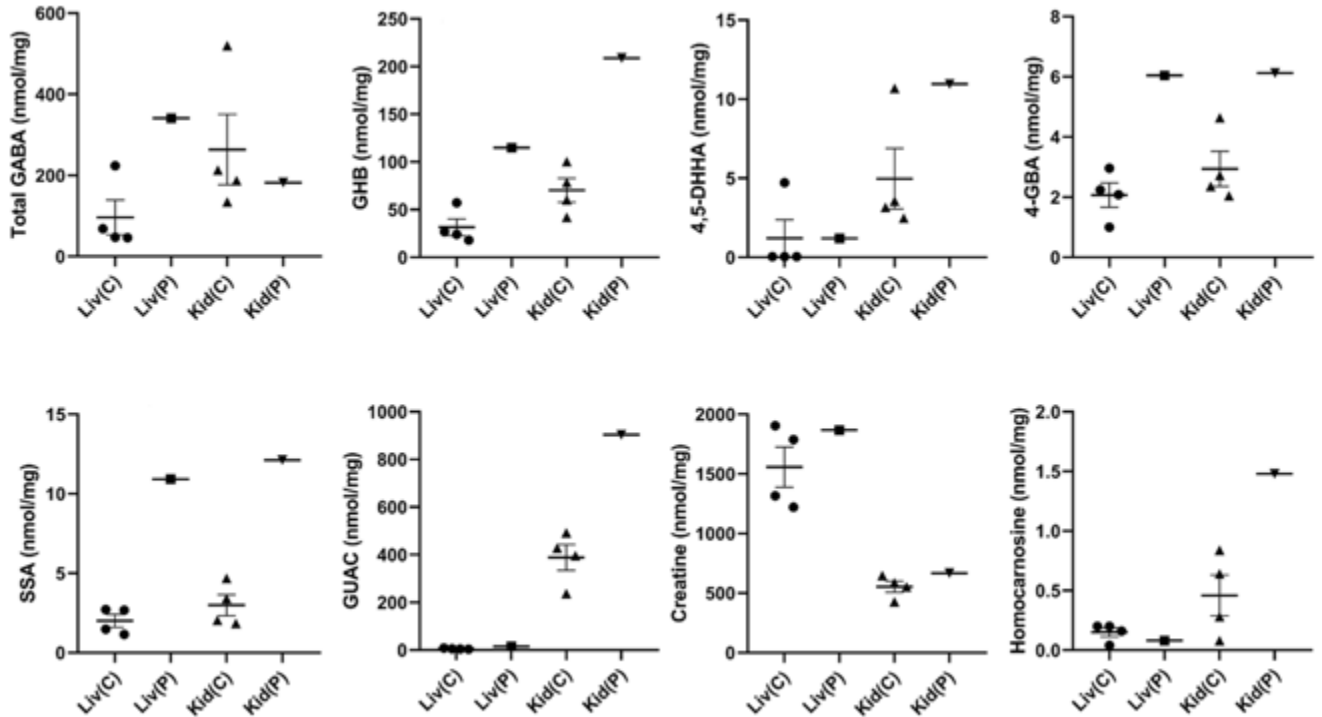

**Quantitation of D- and L-2-hydroxyglutaric acids in pooled brain regions (top panels), as well as liver and kidney (bottom panels) using isotope dilution mass spectrometry.** Values in top panels represent the sum of all analyses across all brain regions for both  $n=4$  controls and the patient (regions: cerebellum, frontal and parietal cortices, pons, hippocampus, cerebral cortex, cerebellum). Statistical analyses, two-tailed t test ( $p=ns$  for both). Data depicted as mean + SEM. Bottom panels depict the range (mean + SEM) for controls ( $n=4$ ) controls in both liver (liv) and kidney (kid), as well as the value obtained for the patient. Additional abbreviation: P, patient; C, control. Since only a single measure for the patient was available, statistical evaluation was not undertaken (PNG 7.20 mb)
